# Supplementary material for: Crop Contamination and Human Exposure to Per- and Polyfluoroalkyl Substances around a Fluorochemical Industrial Park in China
Source: MDPI journal article supplement (doi:10.3390/toxics12040269), 2024-04-04
Supplement: s1 [file s1]

# Crop Contamination and Human Exposure to Per- and Polyfluoroalkyl Substances around a Fluorochemical Industrial Park in China

Kairan Xu <sup>1</sup>, Jian Huang <sup>1</sup>, Yufeng Zhang <sup>1</sup>, Xilong Wu <sup>1</sup>, Dan Cai <sup>2,3,\*</sup>, Guocheng Hu <sup>2,3</sup>, Yu Li <sup>2,4</sup>, Zhuobiao Ni <sup>1</sup>, Qingqi Lin <sup>1,\*</sup>, Shizhong Wang <sup>5,6</sup> and Rongliang Qiu <sup>1,5</sup>

Maoming and Heyuan Branch, Guangdong Laboratory for Lingnan Modern Agriculture, Guangdong  
Provincial Key Laboratory of Agricultural & Rural Pollution Abatement and Environmental Safety, College of Natural Resources and Environment, South China Agricultural University, Guangzhou 510642, China;  
xukairan@stu.scau.edu.cn (K.X.); huangjian\_scau@foxmail.com (J.H.); zhangyufeng1214@foxmail.com (Y.Z.); caramel\_ln@foxmail.com (X.W.); nizhuobiao@scau.edu.cn (Z.N.); qiurl@scau.edu.cn (R.Q.)  
<sup>2</sup> South China Institute of Environmental Sciences, Ministry of Ecology and Environment, Guangzhou 510655, China;  
<sup>3</sup> State Environmental Protection Key Laboratory of Environmental Pollution Health Risk Assessment, Guangzhou 510655, China  
<sup>4</sup> State Environmental Protection Key Laboratory of Urban Ecological Simulation and Protection, Guangzhou 510655, China  
<sup>5</sup> School of Environmental Science and Engineering, Sun Yat-sen University, Guangzhou 510006, China;  
<sup>6</sup> Guangdong Provincial Key Laboratory of Environmental Pollution Control and Remediation Technology, Guangdong Provincial Engineering Research Center for Heavy Metal Contaminated Soil Remediation, Guangzhou 510006, China  
\* Correspondence: caidan@scies.org (D.C.); linqingqi@scau.edu.cn (Q.L.)

Includes:

16 Pages

1 Supplementary M

8 Tables

1 Figure

## Supplementary M

### Standards and Reagents

The 14 PFAAs, 2 precursors and 9 novel alternatives used in the experiments were purchased from Wellington Laboratories with purities of >98% (Guelph, Ontario, Canada) (Table S3). Information on other reagents used in the experiment is given in Table S2.

### Sample extraction

The extraction methods for soil and plant samples were based on published methods with minor modifications and optimisation. For the extraction of soil samples, 0.5 g of freeze-dried and ground soil was placed in a 50 mL polypropylene centrifuge tube (PP), to which 50  $\mu$ L of internal standard mix (100 ng/mL) was added. Add 5 mL of acetonitrile/water (90:10, v/v), vortex for 60 s and sonicate in a water bath for 10 min. Centrifuge the sonicated sample at 8000 rpm for 10 min and transfer the supernatant to another 50 mL polypropylene centrifuge tube. The supernatant was transferred to another 50 mL PP tube. 5 mL of acetonitrile was added to the soil sample tube and the vortexing and centrifugation steps were repeated to collect the supernatant. Finally, 5 mL of acetonitrile/water was added and the above vortexing and centrifugation steps were repeated, and the supernatant was collected in the above 50 mL centrifuge tube (total volume of about 15 mL). The collected supernatant was concentrated to approximately 0.5 mL using nitrogen at 40 °C. Experiments were carried out using OASIS WAX-SPE to purify the target

extract. The WAX cartridges were first pretreated with 5 mL of methanol and 5 mL of Milli-Q water was added after the methanol flow-through. The remaining 0.5 mL of the nitrogen purge was added to the WAX cartridges using a polypropylene disposable burette. 1 mL of methanol was added to the centrifuge tube and the burette was cleaned by ultrasonication for 1 min, then the methanol was added to the WAX cartridges. 10 mL of Milli-Q water was added to the centrifuge tube, and the ultrasonication step was repeated for 1 min, and the cleaned water was added to the WAX cartridges. The water in the tube was cleaned and added to the WAX cartridges. After the liquid in the WAX cartridges was completely dripped, vacuum pump was used to evacuate for 1 h. The eluate was collected using a 10 mL polyethylene centrifuge tube, 4 mL of methanol was added to the WAX cartridges first, and then 4 mL of 0.1% ammonia hydroxide methanol (ammonia hydroxide/methanol, v/v) was added after the drop was completed. The collected eluent was concentrated at 40 °C until nearly dry, then 1 mL of methanol was added to the nitrogen-blown 10 mL centrifuge tube to be fixed, vortexed for 60 s and then ultrasonicated for 10 min. 1 mL syringe was used to absorb the fixed solution, and then the filter head was pumped into a 2 mL injection bottle, which was placed in the refrigerator at -20 °C for storage until the test was performed on the machine.

Plant samples were extracted in the same way as the soil samples described above, with the main difference in the procedure being the use of organic solvents to extract the PFASs from the samples. Since it was difficult to

centrifuge the lyophilised and ground plant tissues, we used filter paper to wrap the plant powder in a 50 mL PP centrifuge tube, and then extracted it in a similar way to the soil sample extraction described above. The contaminants were extracted by adding acetonitrile and acetonitrile/water (90:10, v/v) for ultrasonic cleaning, respectively. The organic solvents were added to submerge the filter paper, and the amount of solution added was about 14 mL. The filter paper used in the experiment was cut to the appropriate size and washed three times with methanol to avoid possible contamination with PFASs. The solution obtained from the three extractions was collected (about 42 mL) and concentrated by nitrogen blowing. Unlike soil samples, plant samples, due to the presence of chlorophyll, required the addition of 0.025 g of ENVI-Carb to the WAX cartridges prior to its activation. Other than that, the rest of the purification steps were the same as for the soil samples. The prepared samples were stored in a refrigerator at -20 °C to be tested on the machine.

1 Table S1. Sampling information for crops.

| Classification    |                           | Samples name      | Number of samples | Type of samples  |
|-------------------|---------------------------|-------------------|-------------------|------------------|
| Central area      | within 300 m from the FIP | Sweet potato leaf | n=1               | Leafy vegetables |
|                   |                           | Pepper            | n=1               | Solanaceae       |
| 1 km from the FIP |                           | Cabbages          | n=1               | Leafy vegetables |
|                   |                           | Water spinach     | n=1               | Leafy vegetables |
|                   |                           | Chinese chive     | n=1               | Leafy vegetables |
|                   |                           | Scallion          | n=1               | Leafy vegetables |
|                   |                           | Eggplant          | n=1               | Solanaceae       |
|                   |                           | Bell pepper       | n=1               | Solanaceae       |
|                   |                           | Pepper            | n=1               | Solanaceae       |
|                   |                           | Sponge gourd      | n=1               | Cucurbitaceae    |
|                   |                           | French bean       | n=1               | Leguminosae      |
|                   |                           | Snow pea          | n=1               | Leguminosae      |
| 3 km from the FIP |                           | Sweet potato leaf | n=2               | Leafy vegetables |
|                   |                           | Water spinach     | n=1               | Leafy vegetables |
|                   |                           | Celery            | n=1               | Leafy vegetables |

|               |     |                  |
|---------------|-----|------------------|
| Spinach       | n=1 | Leafy vegetables |
| Chinese chive | n=2 | Leafy vegetables |
| Scallion      | n=1 | Leafy vegetables |
| Eggplant      | n=3 | Solanaceae       |
| Pepper        | n=1 | Solanaceae       |
| Maize         | n=3 | Gramineae        |
| Sponge gourd  | n=2 | Cucurbitaceae    |
| Cucumber      | n=2 | Cucurbitaceae    |
| French bean   | n=1 | Leguminosae      |
| Soybean       | n=1 | Leguminosae      |

2 Table S2. Information on reagents and materials used in the experiment

| Reagents                                  | Purity<br>/Specification | Manufacturer           |
|-------------------------------------------|--------------------------|------------------------|
| Methanol                                  | HPLC-grade               | Anpel <sup>a</sup>     |
| Acetonitrile                              | HPLC-grade               | Anpel                  |
| Ammonium acetate                          | >99%                     | Aladdin <sup>b</sup>   |
| Aqueous ammonia                           | >99%                     | Aladdin                |
| Supelclean graphitized carbon (ENVI-Carb) | HPLC-grade               | Supelco <sup>c</sup>   |
| Oasis WAX SPE cartridges                  | 6 cc, 500 mg             | Waters <sup>d</sup>    |
| GHP Pall membrane                         | 13 mm, 0.2 μm            | Pall Corp <sup>e</sup> |

3 <sup>a</sup>Anpel, Anpel Laboratory Technologies Inc (Shanghai, China);

4   <sup>b</sup>Aladdin, Aladdin Testing Co. Ltd. (Shanghai, China);

5   <sup>c</sup>Supelco, Supelco (Bellefonte, PA, USA);

6   <sup>d</sup>Waters, Waters Corporation (Milford, MA, USA);

7   <sup>e</sup>Pall Corp, Pall Corp (Port Washington, NY, USA).

8

9 Table S3. The particular chemical names and chemical formula of the target analytes.

| Abbreviation                                 | Chemical name            | Chemical formula                                |
|----------------------------------------------|--------------------------|-------------------------------------------------|
| <b>Perfluoroalkyl carboxylic acids PFCAs</b> |                          |                                                 |
| PFBA                                         | Perfluorobutanoic acid   | C <sub>4</sub> HF <sub>7</sub> O <sub>2</sub>   |
| PFHxA                                        | Perfluorohexanoic acid   | C <sub>6</sub> HF <sub>11</sub> O <sub>2</sub>  |
| PFHpA                                        | Perfluoroheptanoic acid  | C <sub>7</sub> HF <sub>13</sub> O <sub>2</sub>  |
| PFOA                                         | Perfluorooctanoic acid   | C <sub>8</sub> HF <sub>15</sub> O <sub>2</sub>  |
| PFNA                                         | Perfluorononanoic acid   | C <sub>9</sub> HF <sub>17</sub> O <sub>2</sub>  |
| PFDA                                         | Perfluorodecanoic acid   | C <sub>10</sub> HF <sub>19</sub> O <sub>2</sub> |
| PFUnDA                                       | Perfluoroundecanoic acid | C <sub>11</sub> HF <sub>21</sub> O <sub>2</sub> |
| PFDoDA                                       | Perfluorododecanoic acid | C <sub>12</sub> HF <sub>23</sub> O <sub>2</sub> |
| <b>Perfluoroalkane sulfonic acids PFSAs</b>  |                          |                                                 |



|       |                            |                                                  |
|-------|----------------------------|--------------------------------------------------|
| PFBS  | Perfluorobutane sulfonate  | C <sub>4</sub> F <sub>9</sub> SO <sub>3</sub> H  |
| PFPeS | Perfluoropentane sulfonate | C <sub>5</sub> F <sub>11</sub> SO <sub>3</sub> H |
| PFHxS | Perfluorohexane sulfonate  | C <sub>6</sub> F <sub>13</sub> SO <sub>3</sub> H |
| PFHpS | Perfluoroheptane sulfonate | C <sub>7</sub> F <sub>15</sub> SO <sub>3</sub> H |
| PFOS  | Perfluorooctane sulfonate  | C <sub>8</sub> F <sub>17</sub> SO <sub>3</sub> H |
| PFNS  | Perfluorononane sulfonate  | C <sub>9</sub> F <sub>19</sub> SO <sub>3</sub> H |

#### **Precursor substances**

|           |                                               |                                                                  |
|-----------|-----------------------------------------------|------------------------------------------------------------------|
| N-MeFOSAA | N-methylperfluorooctanesulfonamidoacetic acid | C <sub>11</sub> H <sub>6</sub> F <sub>17</sub> NO <sub>4</sub> S |
| N-EtFOSAA | N-ethylperfluorooctanesulfonamidoacetic acid  | C <sub>12</sub> H <sub>8</sub> F <sub>17</sub> NO <sub>4</sub> S |

#### **Alternatives**

|              |                                                        |                                                    |
|--------------|--------------------------------------------------------|----------------------------------------------------|
| 8Cl-PFOS     | Perfluoro-8-chloro-1-octanesulfonic acid               | C <sub>8</sub> HCIF <sub>16</sub> O <sub>3</sub> S |
| 6:2 Cl-PFESA | 6:2 chlorinated polyfluorinated<br>ether sulfonic acid | C <sub>8</sub> HCIF <sub>16</sub> O <sub>4</sub> S |

---

---

|                           |                                                     |                              |
|---------------------------|-----------------------------------------------------|------------------------------|
| 8:2 Cl- PFESA             | 8:2 chlorinated polyfluorinated ether sulfonic acid | $C_{10}HClF_{20}O_4S$        |
| HFPO-DA                   | Hexafluoropropylene oxide dimer acid                | $C_6HF_{11}O_3$              |
| HFPO-TA                   | Hexafluoropropylene oxide trimer acid               | $C_9HF_{17}O_4$              |
| HFPO-TeA                  | Hexafluoropropylene oxide tetramer acid             | $C_{12}HF_{23}O_5$           |
| 4:2 FTS                   | 4:2 fluorotelomer sulfonic acid                     | $C_6H_5F_9O_3S$              |
| 6:2 FTS                   | 6:2 fluorotelomer sulfonic acid                     | $C_8H_5F_{13}O_3S$           |
| 8:2 FTS                   | 8:2 fluorotelomer sulfonic acid                     | $C_{10}H_5F_{17}O_3S$        |
| <b>Internal standards</b> |                                                     |                              |
| MPFBA                     | $^{13}C_4$ Perfluorobutanoic acid                   | $^{13}C_4HF_7O_2$            |
| M5PFHxA                   | $^{13}C_5$ Perfluorohexanoic acid                   | $^{13}C_5^{12}C_1HF_{11}O_2$ |
| M4PFHpA                   | $^{13}C_4$ Perfluoroheptanoic acid                  | $^{13}C_4^{12}C_3HF_{13}O_2$ |
| M8PFOA                    | $^{13}C_8$ Perfluorooctanoic acid                   | $^{13}C_5C_8HF_{15}O_2$      |
| M9PFNA                    | $^{13}C_9$ Perfluorononanoic acid                   | $^{13}C_5C_9HF_{17}O_2$      |

|               |                                                                                                          |                                                                                                           |
|---------------|----------------------------------------------------------------------------------------------------------|-----------------------------------------------------------------------------------------------------------|
| M6PFDA        | <sup>13</sup> C <sub>6</sub> Perfluorodecanoic acid                                                      | <sup>13</sup> C <sub>6</sub> <sup>12</sup> C <sub>4</sub> HF <sub>19</sub> O <sub>2</sub>                 |
| M7PFUnDA      | <sup>13</sup> C <sub>7</sub> Perfluoroundecanoic acid                                                    | <sup>13</sup> C <sub>7</sub> <sup>12</sup> C <sub>4</sub> HF <sub>21</sub> O <sub>2</sub>                 |
| MPFDoDA       | <sup>13</sup> C <sub>2</sub> Perfluorododecanoic acid                                                    | <sup>13</sup> C <sub>2</sub> <sup>12</sup> C <sub>10</sub> HF <sub>23</sub> O <sub>2</sub>                |
| M3HFPO-DA     | <sup>13</sup> C <sub>3</sub> Hexafluoropropylene oxide dimer acid                                        | <sup>13</sup> C <sub>3</sub> <sup>12</sup> C <sub>3</sub> C <sub>6</sub> HF <sub>11</sub> O <sub>3</sub>  |
| d3- N-MeFOSAA | <sup>12</sup> C <sub>11</sub> <sup>2</sup> H <sub>3</sub> N-methyl perfluorooctanesulfonamidoacetic acid | C <sub>11</sub> <sup>2</sup> H <sub>3</sub> <sup>1</sup> H <sub>3</sub> F <sub>17</sub> NO <sub>4</sub> S |
| d5- N-EtFOSAA | <sup>12</sup> C <sub>12</sub> <sup>2</sup> H <sub>5</sub> N-ethyl perfluorooctanesulfonamidoacetic acid  | C <sub>12</sub> <sup>2</sup> H <sub>5</sub> <sup>1</sup> H <sub>3</sub> F <sub>17</sub> NO <sub>4</sub> S |
| M3PFBS        | <sup>13</sup> C <sub>3</sub> Perfluorobutane sulfonate                                                   | <sup>13</sup> C <sub>3</sub> <sup>12</sup> C <sub>1</sub> F <sub>9</sub> SO <sub>3</sub> H                |
| M3PFHxS       | <sup>13</sup> C <sub>3</sub> Perfluorohexane sulfonate                                                   | <sup>13</sup> C <sub>3</sub> <sup>12</sup> C <sub>3</sub> F <sub>13</sub> SO <sub>3</sub> H               |
| M8PFOS        | <sup>13</sup> C <sub>8</sub> Perfluorooctane sulfonate                                                   | <sup>13</sup> C <sub>8</sub> F <sub>17</sub> SO <sub>3</sub> H                                            |
| M2-4:2 FTS    | <sup>13</sup> C <sub>2</sub> 4:2 fluorotelomer sulfonic acid                                             | <sup>13</sup> C <sub>2</sub> <sup>12</sup> C <sub>4</sub> H <sub>5</sub> F <sub>9</sub> O <sub>3</sub> S  |
| M2-6:2 FTS    | <sup>13</sup> C <sub>2</sub> 6:2 fluorotelomer sulfonic acid                                             | <sup>13</sup> C <sub>2</sub> <sup>12</sup> C <sub>6</sub> H <sub>5</sub> F <sub>13</sub> O <sub>3</sub> S |
| M2-8:2 FTS    | <sup>13</sup> C <sub>2</sub> 8:2 fluorotelomer sulfonic acid                                             | <sup>13</sup> C <sub>2</sub> <sup>12</sup> C <sub>8</sub> H <sub>5</sub> F <sub>17</sub> O <sub>3</sub> S |

- 11 Table S4. UPLC-MS/MS instrument parameters for the quantification of target  
 12 PFASs

| UPLC-MS/MS conditions |                                                                          |       |       |                    |
|-----------------------|--------------------------------------------------------------------------|-------|-------|--------------------|
| Instrument            | Agilent 1290 infinity II UPLC coupled to an API 5500                     |       |       |                    |
|                       | triple-quadrupole mass spectrometer (AB SCIEX Inc., Framingham, MA, USA) |       |       |                    |
| Analytical column     | Acquity BEH C18 column (100 mm × 2.1 mm, 1.7 μm, Waters, MA, USA)        |       |       |                    |
| Column temperature    | 40 °C                                                                    |       |       |                    |
| Injection volume      | 2 μL                                                                     |       |       |                    |
| Mobile phase          | 2 mM ammonium acetate in water (A) and acetonitrile                      |       |       |                    |
|                       | (B)                                                                      |       |       |                    |
| Gradient              | Time (min)                                                               | A (%) | B (%) | Flow rate (mL/min) |
|                       | 0                                                                        | 70    | 30    | 0.3                |
|                       | 0.5                                                                      | 70    | 30    | 0.3                |
|                       | 10                                                                       | 0     | 100   | 0.3                |
|                       | 11                                                                       | 0     | 100   | 0.3                |
|                       | 11.2                                                                     | 70    | 30    | 0.3                |
|                       | 13                                                                       | 70    | 30    | 0.3                |

|            |                             |
|------------|-----------------------------|
|            | API 5500, AB Sciex          |
|            | Ion Spray Voltage: -4.2 kV; |
|            | Curtain Gas: 20 psi;        |
| Other mass | Collision Gas: 9 psi;       |
| parameters | Temperature: 300 °C;        |
|            | Ion Source Gas 1: 50 psi    |
|            | Ion Source Gas 2: 40 psi    |

---

14 Table S5. Optimal UPLC-MS/MS parameters for the target PFASs and internal standards

| Analyte | Precursor ion | Product ion           | DP <sup>a</sup> | CE <sup>b</sup> | Internal standard                    |
|---------|---------------|-----------------------|-----------------|-----------------|--------------------------------------|
| PFBA    | 213           | 169 <sup>c</sup> /147 | -38             | -11             | <sup>13</sup> C <sub>4</sub> -PFBA   |
| PFHxA   | 313           | 269 <sup>c</sup> /119 | -45             | -11             | <sup>13</sup> C <sub>5</sub> -PFHxA  |
| PFHpA   | 363           | 319 <sup>c</sup> /169 | -40             | -13             | <sup>13</sup> C <sub>4</sub> -PFHpA  |
| PFOA    | 413           | 369 <sup>c</sup> /169 | -60             | -15             | <sup>13</sup> C <sub>8</sub> -PFOA   |
| PFNA    | 463           | 419 <sup>c</sup> /219 | -72             | -14             | <sup>13</sup> C <sub>9</sub> -PFNA   |
| PFDA    | 513           | 469 <sup>c</sup> /219 | -57             | -16             | <sup>13</sup> C <sub>6</sub> -PFDA   |
| PFUnDA  | 563           | 519 <sup>c</sup> /269 | -80             | -18             | <sup>13</sup> C <sub>7</sub> -PFUnDA |
| PFDoDA  | 613           | 569 <sup>c</sup> /169 | -90             | -15             | <sup>13</sup> C <sub>2</sub> -PFDoDA |
| PFBS    | 299           | 80 <sup>c</sup> /99   | -82             | -67             | <sup>13</sup> C <sub>3</sub> -PFBS   |
| PFPeS   | 349           | 80 <sup>c</sup> /99   | -150            | -70             | <sup>13</sup> C <sub>3</sub> -PFHxS  |

|               |     |                       |        |       |                                       |
|---------------|-----|-----------------------|--------|-------|---------------------------------------|
| PFHxS         | 399 | 80 <sup>c</sup> /99   | -100   | -72   | <sup>13</sup> C <sub>3</sub> -PFHxS   |
| PFHpS         | 449 | 80 <sup>c</sup> /99   | -110   | -99   | <sup>13</sup> C <sub>3</sub> -PFHxS   |
| PFOS          | 499 | 80 <sup>c</sup> /99   | -83    | -101  | <sup>13</sup> C <sub>8</sub> -PFOS    |
| PFNS          | 549 | 80 <sup>c</sup> /99   | -117.2 | -115  | <sup>13</sup> C <sub>8</sub> -PFOS    |
| N-MeFOSAA     | 570 | 419 <sup>c</sup> /219 | -80    | -29   | d <sub>3</sub> -N-MeFOSAA             |
| N-EtFOSAA     | 584 | 419 <sup>c</sup> /219 | -55    | -28   | d <sub>3</sub> -N-EtFOSAA             |
| 6:2 Cl-PFESA  | 531 | 351 <sup>c</sup> /83  | -85    | -36.3 | <sup>13</sup> C <sub>8</sub> -PFOS    |
| 8:2 Cl- PFESA | 631 | 451 <sup>c</sup> /83  | -139   | -38   | <sup>13</sup> C <sub>8</sub> -PFOS    |
| 8Cl-PFOS      | 515 | 99                    | -90    | -93   | <sup>13</sup> C <sub>8</sub> -PFOS    |
| HFPO-DA       | 329 | 285                   | -37    | -7    | <sup>13</sup> C <sub>3</sub> -HFPO-DA |
| HFPO-TA       | 495 | 185 <sup>c</sup> /119 | -51    | -20   | <sup>13</sup> C <sub>8</sub> -PFOA    |
| HFPO-TeA      | 661 | 185 <sup>c</sup> /119 | -58    | -35   | <sup>13</sup> C <sub>8</sub> -PFOA    |
| 4:2 FTS       | 327 | 307 <sup>c</sup> /81  | -98    | -27   | <sup>13</sup> C <sub>2</sub> -4:2 FTS |

---

---

|                                       |     |                      |      |     |                                       |
|---------------------------------------|-----|----------------------|------|-----|---------------------------------------|
| 6:2 FTS                               | 427 | 407 <sup>c</sup> /81 | -81  | -33 | <sup>13</sup> C <sub>2</sub> -6:2 FTS |
| 8:2 FTS                               | 527 | 507 <sup>c</sup> /81 | -60  | -35 | <sup>13</sup> C <sub>2</sub> -8:2 FTS |
| <sup>13</sup> C <sub>4</sub> -PFBA    | 217 | 172                  | -40  | -12 |                                       |
| <sup>13</sup> C <sub>5</sub> -PFHxA   | 318 | 273                  | -51  | -14 |                                       |
| <sup>13</sup> C <sub>4</sub> -PFHpA   | 367 | 322                  | -61  | -13 |                                       |
| <sup>13</sup> C <sub>8</sub> -PFOA    | 421 | 376                  | -45  | -14 |                                       |
| <sup>13</sup> C <sub>9</sub> -PFNA    | 472 | 427                  | -62  | -16 |                                       |
| <sup>13</sup> C <sub>6</sub> -PFDA    | 519 | 474                  | -75  | -17 |                                       |
| <sup>13</sup> C <sub>7</sub> -PFUnDA  | 570 | 525                  | -40  | -17 |                                       |
| <sup>13</sup> C <sub>2</sub> -PFDoDA  | 615 | 570                  | -65  | -18 |                                       |
| <sup>13</sup> C <sub>3</sub> -HFPO-DA | 332 | 287                  | -35  | -9  |                                       |
| d <sub>3</sub> -N-MeFOSAA             | 573 | 419                  | -86  | -28 |                                       |
| d <sub>3</sub> -N-EtFOSAA             | 589 | 419                  | -107 | -29 |                                       |



|                                       |     |                      |      |      |
|---------------------------------------|-----|----------------------|------|------|
| <sup>13</sup> C <sub>3</sub> -PFBS    | 302 | 80                   | -52  | -59  |
| <sup>13</sup> C <sub>3</sub> -PFHxS   | 402 | 80                   | -168 | -85  |
| <sup>13</sup> C <sub>8</sub> -PFOS    | 507 | 80                   | -180 | -106 |
| <sup>13</sup> C <sub>2</sub> -4:2 FTS | 329 | 309 <sup>c</sup> /81 | -85  | -29  |
| <sup>13</sup> C <sub>2</sub> -6:2 FTS | 429 | 409 <sup>c</sup> /81 | -85  | -34  |
| <sup>13</sup> C <sub>2</sub> -8:2 FTS | 529 | 509 <sup>c</sup> /81 | -83  | -38  |

---

15      <sup>a</sup> Decluster potential.

16      <sup>b</sup> Collision energy.

17      <sup>c</sup> Quantitative ion.

18 Table S6. The matrix spike recoveries (MSRs  $\pm$  SD) of individual PFASs in crops  
 19 and soil.

| Compounds                   | Soil             | Crops            |
|-----------------------------|------------------|------------------|
| <b>PFCA<sub>s</sub></b>     |                  |                  |
| PFBA                        | 88.2 $\pm$ 9.4%  | 100.7 $\pm$ 6%   |
| PFH <sub>x</sub> A          | 101 $\pm$ 9.1%   | 95.5 $\pm$ 2.1%  |
| PFH <sub>p</sub> A          | 89.3 $\pm$ 3.8%  | 99.5 $\pm$ 0.8%  |
| PFOA                        | 85.5 $\pm$ 1.0%  | 100.7 $\pm$ 1.7% |
| PFNA                        | 85.2 $\pm$ 2.8%  | 97.4 $\pm$ 2.9%  |
| PFDA                        | 91.8 $\pm$ 2.2%  | 93.6 $\pm$ 6.5%  |
| PFUnDA                      | 89.0 $\pm$ 1.9%  | 98.8 $\pm$ 3.9%  |
| PFDoDA                      | 90.9 $\pm$ 5.4%  | 96.0 $\pm$ 3.0%  |
| <b>PFSA<sub>s</sub></b>     |                  |                  |
| PFBS                        | 94.2 $\pm$ 5.9%  | 94.1 $\pm$ 14.0% |
| PFPeS                       | 90.0 $\pm$ 7.0%  | 100.9 $\pm$ 2.7% |
| PFH <sub>x</sub> S          | 107.5 $\pm$ 9.8% | 93.1 $\pm$ 5.8%  |
| PFH <sub>p</sub> S          | 95.5 $\pm$ 8.2%  | 95.0 $\pm$ 6.5%  |
| PFOS                        | 84.4 $\pm$ 4.8%  | 96.7 $\pm$ 0.9%  |
| PFNS                        | 83.6 $\pm$ 3.4%  | 91.1 $\pm$ 3.9%  |
| <b>Precursor substances</b> |                  |                  |
| N-MeFOSAA                   | 101.6 $\pm$ 3.7% | 99.1 $\pm$ 7.2%  |

|                     |                   |                   |
|---------------------|-------------------|-------------------|
| N-EtFOSAA           | $87.2 \pm 6.7\%$  | $93.2 \pm 2.0\%$  |
| <b>Alternatives</b> |                   |                   |
| 6:2 Cl-PFESA        | $82.9 \pm 3.4\%$  | $95.0 \pm 3.8\%$  |
| 8:2 Cl- PFESA       | $79.9 \pm 8.6\%$  | $104.5 \pm 2.7\%$ |
| 8Cl-PFOS            | $80.0 \pm 8.0\%$  | $86.2 \pm 3.9\%$  |
| HFPO-DA             | $91.0 \pm 2.8\%$  | $93.7 \pm 8.5\%$  |
| HFPO-TA             | $108.3 \pm 1.3\%$ | $105 \pm 3.5\%$   |
| HFPO-TeA            | $95.4 \pm 10.7\%$ | $103.2 \pm 0.4\%$ |
| 4:2 FTS             | $91.7 \pm 3.6\%$  | $106.6 \pm 4.7\%$ |
| 6:2 FTS             | $80.5 \pm 3.1\%$  | $102.7 \pm 1.4\%$ |
| 8:2 FTS             | $79.9 \pm 8.6\%$  | $104.5 \pm 2.7\%$ |

---

21 Table S7. Reference daily crop intake (g/d), body weight (BW, kg) and Maximum moisture content of different crops for three age  
 22 groups in urban and rural areas of China.

|                  | Toddlers (2-5 y) |       | Children and teenagers (6-17 y) |       | Adults (>18 y) |       | Moisture content |
|------------------|------------------|-------|---------------------------------|-------|----------------|-------|------------------|
|                  | Urban            | Rural | Urban                           | Rural | Urban          | Rural |                  |
| Leafy vegetables | 143.9            | 120.9 | 194.8                           | 175.2 | 276.2          | 285.6 | 95.8%            |
| Solanaceae       | 143.9            | 120.9 | 194.8                           | 175.2 | 276.2          | 285.6 | 95.6%            |
| Gramineae        | 143.9            | 120.9 | 194.8                           | 175.2 | 276.2          | 285.6 | 71.3%            |
| Cucurbitaceae    | 143.9            | 120.9 | 194.8                           | 175.2 | 276.2          | 285.6 | 96.6%            |
| Leguminosae      | 143.9            | 120.9 | 194.8                           | 175.2 | 276.2          | 285.6 | 91.9%            |
| BW               | 18               | 17    | 41.5                            | 36.1  | 63.7           | 61.9  |                  |



| HRs   | HR (Leafy vegetables) |       |        |       |       |       | HR (Solanaceae) |       |        |       |       |       | HR (Gramineae) |       |        |       |       |       |
|-------|-----------------------|-------|--------|-------|-------|-------|-----------------|-------|--------|-------|-------|-------|----------------|-------|--------|-------|-------|-------|
| Age   | 2-5 y                 |       | 6-17 y |       | >18 y |       | 2-5 y           |       | 6-17 y |       | >18 y |       | 2-5 y          |       | 6-17 y |       | >18 y |       |
| Area  | U                     | R     | U      | R     | U     | R     | U               | R     | U      | R     | U     | R     | U              | R     | U      | R     | U     | R     |
| PFBA  | 0.009                 | 0.008 | 0.006  | 0.006 | 0.005 | 0.005 | 0.012           | 0.011 | 0.007  | 0.007 | 0.007 | 0.007 | 0.004          | 0.003 | 0.003  | 0.002 | 0.002 | 0.002 |
| PFHxA | 0.003                 | 0.002 | 0.002  | 0.002 | 0.002 | 0.002 | ND              | ND    | ND     | ND    | ND    | ND    | ND             | ND    | ND     | ND    | ND    | ND    |
| PFOA  | 0.035                 | 0.031 | 0.020  | 0.021 | 0.019 | 0.020 | ND              | ND    | ND     | ND    | ND    | ND    | ND             | ND    | ND     | ND    | ND    | ND    |
| PFBS  | ND                    | ND    | ND     | ND    | ND    | ND    | 0.011           | 0.010 | 0.007  | 0.007 | 0.006 | 0.006 | ND             | ND    | ND     | ND    | ND    | ND    |
| HFPO- |                       |       |        |       |       |       |                 |       |        |       |       |       |                |       |        |       |       |       |
| DA    | 0.004                 | 0.003 | 0.002  | 0.002 | 0.002 | 0.002 | 0.001           | 0.001 | 0.001  | 0.001 | 0.001 | 0.001 | ND             | ND    | ND     | ND    | ND    | ND    |
| HI    | 0.051                 | 0.045 | 0.030  | 0.031 | 0.027 | 0.030 | 0.025           | 0.022 | 0.014  | 0.015 | 0.013 | 0.014 | 0.004          | 0.003 | 0.003  | 0.002 | 0.002 | 0.002 |

25 Table S8. HRs from consumption of contaminated crops by urban and rural residents of different age groups

26

27 Continue:

| HRs     | HR (Cucurbitaceae) |       |        |       |       |       | HR (Leguminosae) |       |        |       |       |       |
|---------|--------------------|-------|--------|-------|-------|-------|------------------|-------|--------|-------|-------|-------|
| Age     | 2-5 y              |       | 6-17 y |       | >18 y |       | 2-5 y            |       | 6-17 y |       | >18 y |       |
| Area    | U                  | R     | U      | R     | U     | R     | U                | R     | U      | R     | U     | R     |
| PFBA    | 0.001              | 0.001 | 0.001  | 0.001 | 0.001 | 0.001 | 0.017            | 0.015 | 0.010  | 0.010 | 0.009 | 0.010 |
| PFHxA   | ND                 | ND    | ND     | ND    | ND    | ND    | ND               | ND    | ND     | ND    | ND    | ND    |
| PFOA    | 0.002              | 0.002 | 0.001  | 0.001 | 0.001 | 0.001 | ND               | ND    | ND     | ND    | ND    | ND    |
| PFBS    | ND                 | ND    | ND     | ND    | ND    | ND    | ND               | ND    | ND     | ND    | ND    | ND    |
| HFPO-DA | 0.001              | 0.001 | ND     | ND    | ND    | ND    | 0.001            | 0.001 | 0.001  | 0.001 | 0.001 | 0.001 |

|    |       |       |       |       |       |       |       |       |       |       |       |       |
|----|-------|-------|-------|-------|-------|-------|-------|-------|-------|-------|-------|-------|
| HI | 0.004 | 0.003 | 0.002 | 0.002 | 0.002 | 0.002 | 0.019 | 0.017 | 0.011 | 0.012 | 0.010 | 0.011 |
|----|-------|-------|-------|-------|-------|-------|-------|-------|-------|-------|-------|-------|

28 Note: ND, nondetectable.

29

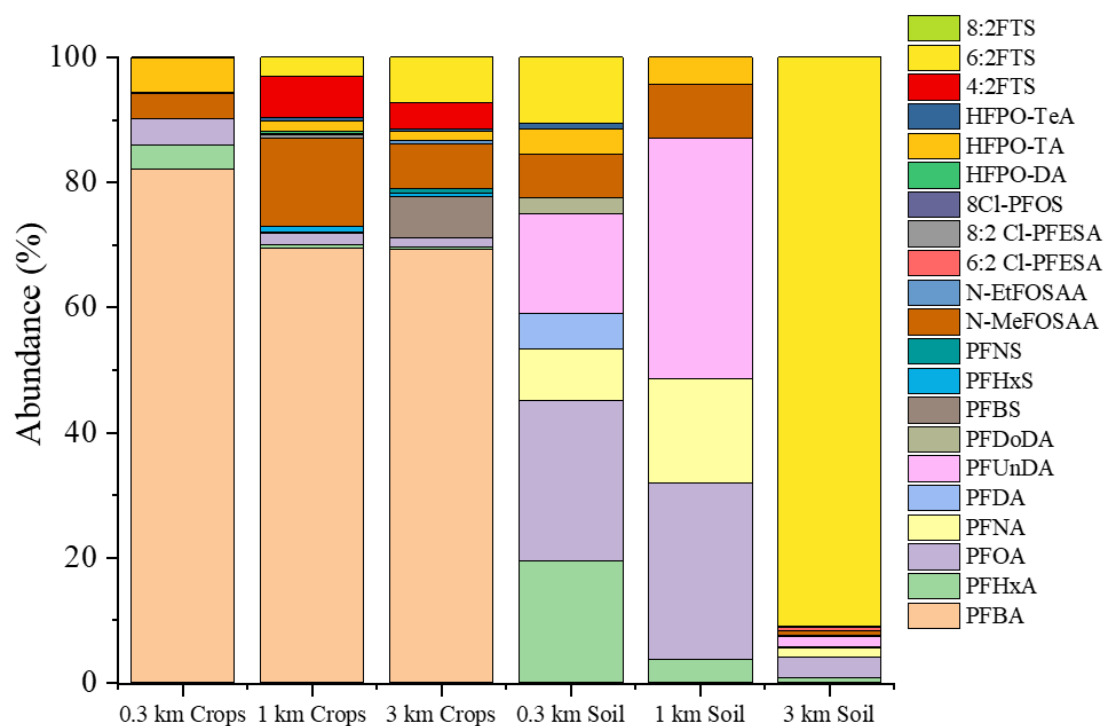

Figure S1. Proportion of different PFASs in soil and crop samples.
